**Prediction Errors Disrupt Hippocampal Representations and  
Update Episodic Memories**

\*Alyssa H. Sinclair<sup>1,2</sup> Grace M. Manalili<sup>2</sup>, Iva K. Brunec<sup>3,4</sup>,  
R. Alison Adcock<sup>1</sup>, & Morgan D. Barense<sup>2,5</sup>

<sup>1</sup> Duke University, *Department of Psychology & Neuroscience*, Durham, NC, 27705, USA

<sup>2</sup> University of Toronto, *Department of Psychology*, Toronto, ON, M5S 3G3, Canada

<sup>3</sup> Temple University, *Department of Psychology*, Philadelphia, PA, 19122, USA

<sup>4</sup> University of Pennsylvania, *Department of Psychology*, Philadelphia, PA, 19104, USA

<sup>5</sup> Baycrest Hospital, *Rotman Research Institute*, Toronto, ON, M64 1W1, Canada

*Keywords:* prediction error, memory, hippocampus, reconsolidation, basal forebrain, acetylcholine, false memory, cognitive neuroscience, fMRI

## Significance

1           Our brains draw on memories to predict the future; when our predictions are incorrect,  
2 we must modify our memories to improve future predictions. Past studies have demonstrated that  
3 the hippocampus signals *prediction error*, or surprise, but have not linked this neural signal to  
4 memory updating. Here, we uncover this missing connection: We show that prediction errors  
5 change the role of the hippocampus, reversing the relationship between hippocampal activation  
6 and memory outcomes. We examine the mechanisms of this shift in neural processing, showing  
7 that prediction errors disrupt the temporal continuity of hippocampal patterns. We propose that  
8 prediction errors halt internal predictions and destabilize memories, enabling updating. Our  
9 findings bear implications for improving education, understanding eyewitness memory  
10 distortion, and treating pathological memories.

1 **Abstract**

2       The brain supports adaptive behavior by generating predictions, learning from errors, and  
3 updating memories to accommodate new information. *Prediction error*, or surprise, triggers  
4 learning when reality contradicts expectations. Prior studies have shown that the hippocampus  
5 signals prediction errors, but have never linked this neural signal to memory updating. Here, we  
6 uncover new mechanisms that reveal this missing link. In a human fMRI study, we elicited  
7 mnemonic prediction errors by interrupting familiar narrative videos immediately before the  
8 expected endings. We found that the same amount of hippocampal activation could exert  
9 opposing effects on memory: hippocampal activation preserved memories after expected  
10 endings, but updated memories after prediction errors. In contrast to previous studies, we showed  
11 that univariate activation was insufficient for understanding hippocampal prediction error  
12 signals. We explained this surprising finding by tracking the evolution of hippocampal activation  
13 patterns, and connectivity between the hippocampus and neuromodulatory regions. We found  
14 that hippocampal activation patterns stabilized as each narrative episode unfolded, sustaining  
15 episodic representations. Prediction errors disrupted these sustained representations, and the  
16 degree of disruption predicted memory updating. The relationship between hippocampal  
17 activation and subsequent memory depended on concurrent basal forebrain activation, providing  
18 new evidence about how cholinergic modulation may regulate attention and memory. We  
19 conclude that prediction errors create conditions that favor memory updating, prompting the  
20 hippocampus to abandon ongoing predictions and render memories malleable.

1 **Introduction**

2 In daily life, we continuously draw on past experiences to predict the future. Expectation  
3 and surprise shape learning across many situations, such as when we encounter misinformation  
4 in the news, receive feedback on an exam, or make decisions based on past outcomes. When our  
5 predictions are incorrect, we must update our mnemonic models of the world to support adaptive  
6 behavior. *Prediction error* is a measure of the discrepancy between expectation and reality; this  
7 surprise signal is both evident in brain activity and related to learning success (1–6). The brain  
8 dynamically constructs memories during recall, recreating and revising past experiences based  
9 on new information (7). The intuitive idea that surprise governs learning has long shaped our  
10 understanding of memory, reward learning, perception, action, and social behavior (2, 8–14).  
11 Yet, the neural mechanisms that allow prediction error to update memories remain unknown.

12 Past research has implicated the hippocampus in the mnemonic functions required for  
13 learning from prediction errors: retrieving memories to make predictions, identifying  
14 discrepancies between past and present, and encoding new information (2, 15–20). Functional  
15 MRI (fMRI) studies have shown that hippocampal activation increases after predictions are  
16 violated; this surprise response has been termed *mismatch detection* (18, 19, 21, 22), or  
17 *mnemonic prediction error* (20). Several theoretical frameworks have hypothesized that this  
18 hippocampal prediction error signal could update memories (17, 20, 23–26). Although past  
19 studies have shown that the hippocampus *detects* prediction errors, the impact of this surprise  
20 signal on memory—a crucial link for understanding how we learn from error—has been implied,  
21 but not yet demonstrated.

22 What mechanisms could link hippocampal prediction errors to memory outcomes? A  
23 leading hypothesis is that prediction errors shift the focus of attention and adjust cognitive

1 processing (20, 27–31). After episodes that align with expectations, we should continue  
2 generating predictions and shift attention *internally*, sustaining and reinforcing existing  
3 memories. However, after prediction errors, we should reset our expectations and shift attention  
4 *externally*, preparing to encode new information and update memories. Consistent with this idea,  
5 mnemonic prediction errors have been shown to enhance the hippocampal *input* pathway that  
6 supports encoding, but suppress the *output* pathway that supports retrieval (20). We propose that  
7 surprising events may change hippocampal processing, allowing a memory to be updated with  
8 new information. However, the idea that prediction errors change hippocampal processing and  
9 enable memory updating has yet to be tested.

10         A separate body of research has demonstrated how memories can be updated. Animal and  
11 human research on *reconsolidation* has shown that recalling a memory can temporarily  
12 destabilize the memory trace in the brain, creating a window of opportunity for memory updating  
13 (32–35). Importantly, prediction error is crucial for destabilizing and updating memories (1, 3,  
14 36). Reconsolidation paradigms have elicited prediction errors by imperfectly replicating  
15 encoding experiences (e.g., presenting a conditioned stimulus without the expected outcome) (1,  
16 3, 37, 38). Yet, the mechanisms that permit prediction errors to destabilize memories remain  
17 unknown, and past reconsolidation studies have not measured neural prediction error signals,  
18 such as hippocampal responses.

19         Neuromodulation may be a critical factor that regulates hippocampal processing and  
20 enables memory updating. Currently, there is mixed evidence supporting two hypotheses:  
21 acetylcholine and/or dopamine could act upon the hippocampus to regulate processing after  
22 surprising events (23–26, 28, 30, 39). Several models have proposed that acetylcholine from the  
23 medial septum (within the basal forebrain) regulates the balance between input and output

1 pathways in the hippocampus (26–28, 40–43), thus allowing stored memories to be compared  
2 with perceptual input (30, 43, 44). After prediction errors, acetylcholine release could change  
3 hippocampal processing and enhance encoding or memory updating (25, 28, 39, 42, 44). On the  
4 other hand, dopamine released from the ventral tegmental area (VTA), if transmitted to the  
5 hippocampus, could also modulate hippocampal plasticity after prediction errors. Past studies  
6 have shown that the hippocampus and VTA are co-activated after surprising events (45, 46), and  
7 this co-activation enhances memory encoding and integration (47–50). Similarly, reconsolidation  
8 studies have suggested that both dopamine and acetylcholine may contribute to destabilizing  
9 memories, especially hippocampally-dependent memories (36, 51, 52). Overall, the basal  
10 forebrain and the VTA are both candidate mechanisms for regulating hippocampal processing  
11 after prediction errors, but no past studies have directly tested these predictions. Understanding  
12 specific neuromodulatory mechanisms is important for developing interventions, such as for  
13 counteracting pathological fear memories.

14 In the present study, we adapted methods from reconsolidation paradigms (which are  
15 optimized to update memories) to identify the missing link between hippocampal prediction error  
16 signals and memory updating. Using an fMRI task with human participants, we examined trial-  
17 wise hippocampal responses to prediction errors during narrative videos. During the Day 1  
18 encoding session, participants viewed 70 full-length videos that featured narrative events with  
19 salient endings (e.g., a baseball batter hitting a home run) (Figure 1A). During the Day 2  
20 reactivation session, participants watched the videos again (Figure 1B). We elicited mnemonic  
21 prediction errors by interrupting half of the videos immediately before the expected narrative  
22 ending (e.g., the video ends while the baseball batter is mid-swing). These surprising  
23 interruptions were comparable to the prediction errors employed in reconsolidation studies (1).

1 Half of the videos were presented in Full-length form (identical to the encoding session), and  
2 half were presented in Interrupted form (eliciting prediction error). Reconsolidation group  
3 participants ( $n = 24$ ) completed the Day 2 session while undergoing an fMRI scan, whereas  
4 Immediate control group participants ( $n = 24$ ) completed the study in a behavioral testing room  
5 and were not scanned. Our primary fMRI analyses examined the period immediately following  
6 the offset of Full and Interrupted videos (Post-Video fixation period) during the Day 2 session in  
7 the Reconsolidation group. Importantly, this design compares neural responses to surprising and  
8 expected video endings while controlling for visual and auditory input.

9       Lastly, participants completed a memory test in the form of a structured interview (Figure  
10 1C). On each trial, participants were cued with the name of the video and recalled the narrative.  
11 The experimenter then probed for further details with pre-determined questions (e.g., “Can you  
12 describe the baseball batter’s ethnicity, age range, or clothing?”). Our critical measure of  
13 memory updating was *false memories*. Although it can be adaptive to update real-world  
14 memories by incorporating relevant new information, we expected that our laboratory paradigm  
15 would induce false memories because participants would integrate interfering details across  
16 similar episodes (1, 7). Because we were interested in false memories as a measure of memory  
17 updating, we instructed participants not to guess and permitted them to skip details they could  
18 not recall. In the Reconsolidation group, participants completed the memory test on Day 3, 24  
19 hours after the reactivation session. In the Immediate control group, participants completed the  
20 memory test on Day 2, immediately after the reactivation session (Figure 1D). Reconsolidation  
21 theory states that updating memories requires a delay, because re-stabilizing a memory trace  
22 involves hours of protein synthesis (35, 53). Therefore, the Immediate control group should not  
23 exhibit any memory effects that require protein synthesis-dependent reconsolidation.

1           Our approach in the current study diverged from past work in several important ways,  
2 allowing us to test previously unanswered questions. First, to link hippocampal prediction error  
3 signals to memory updating, we used a reconsolidation-inspired paradigm to transform  
4 naturalistic episodic memories. Second, we identified shifts in hippocampal processing by  
5 tracking how episodic representations were sustained or disrupted over time, going beyond the  
6 univariate activation measures used in previous studies. Third, we tested hypotheses about  
7 neuromodulatory mechanisms by relating activation in the basal forebrain and VTA to  
8 hippocampal processing and memory updating.

9           Using these novel methods, we found the following: 1) Prediction errors selectively  
10 updated memories in the Reconsolidation group. 2) In contrast to past studies, we found that  
11 prediction errors *reversed* the effect of hippocampal activation on memory: After surprising  
12 endings, hippocampal activation was associated with memory updating, but after expected  
13 endings, hippocampal activation was associated with memory preservation. 3) Hippocampal  
14 activation patterns stabilized during and after videos, but prediction errors disrupted these  
15 sustained representations. 4) After prediction errors, disrupting hippocampal patterns led to  
16 memory updating. 5) The effect of prediction error on memory depended on co-activation of the  
17 hippocampus and basal forebrain, supporting the idea that acetylcholine regulates attention and  
18 memory.



## A Encoding Phase: Example Stimulus Video

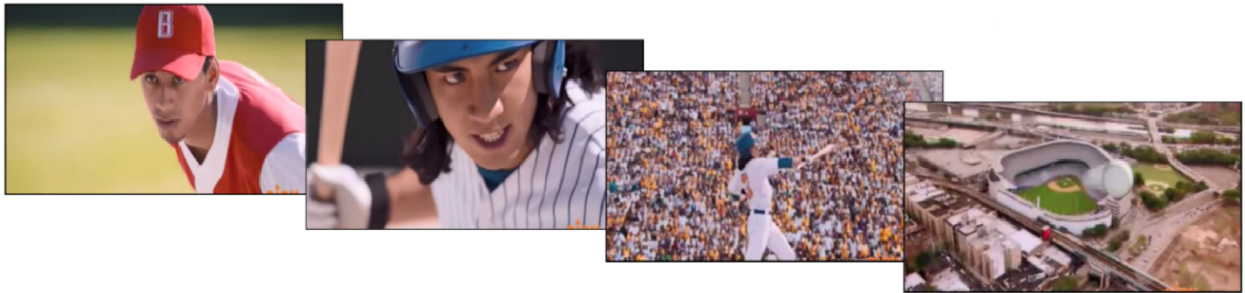

## B Reactivation Phase: Example Trial

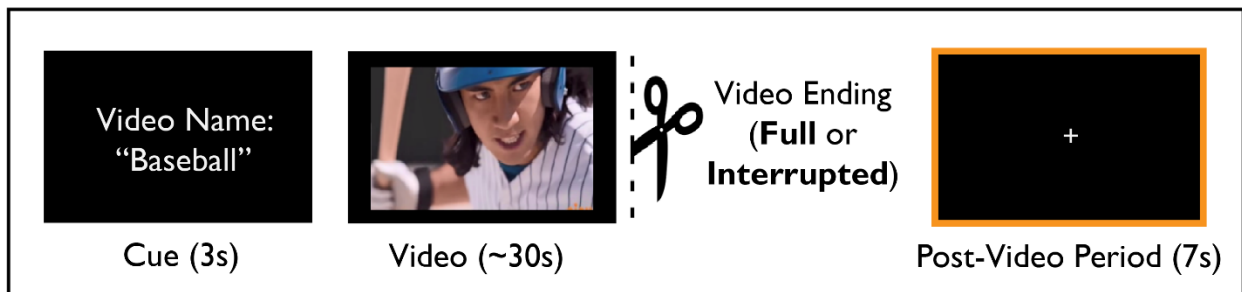

## C Test Phase: Example Memory Test

**Experimenter:** The next video is “Baseball.” Can you describe the main event of the video?

**Participant:** Okay, so they’re **in a stadium**, and there are **lots of people watching**. The **pitcher throws the ball** and the batter **hits it out of the park**.

**Experimenter:** Can you describe the baseball batter? Age range, hair color, ethnicity, or clothing?

**Participant:** He looked **East Asian**, in his **mid-40s**. He was **wearing a red uniform**.

**Experimenter:** Do you remember hair color?

**Participant:** No, I don’t remember.

**Legend:** **Correct Details** **False Memories**

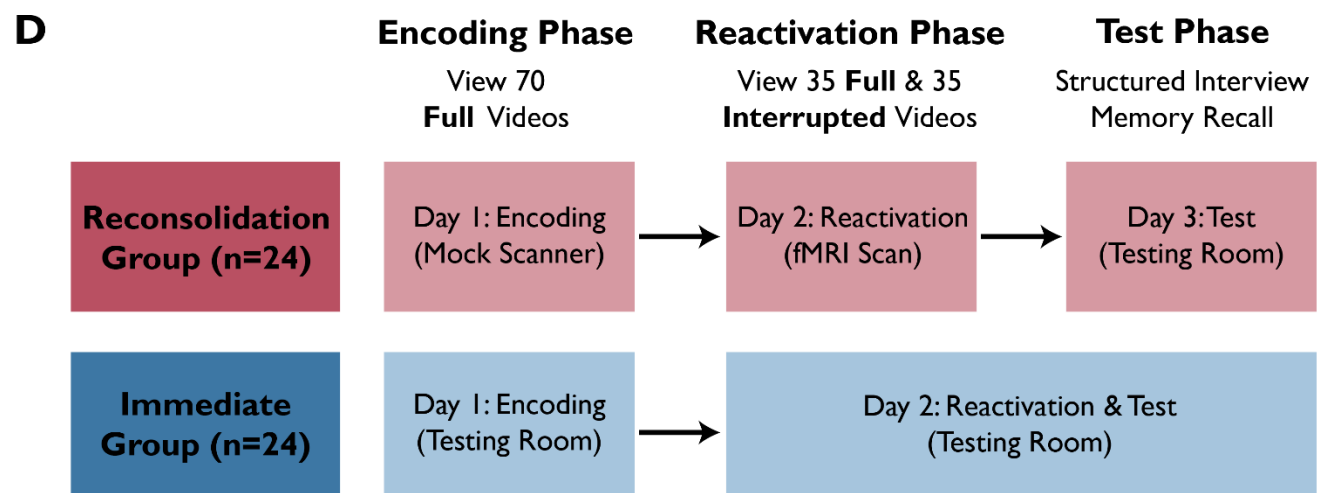

*Figure 1.* Overview of experimental paradigm. A) During the Day 1 Encoding session, all videos were presented in Full-length form. Here we show frames from a stimulus video named “Baseball”, depicting a home run. B) During the Day 2 Reactivation session, participants viewed the videos again, but half were interrupted to elicit prediction error. Participants were cued with the video name, watched the video (Full or Interrupted), and then viewed a fixation screen. The “Baseball” video was interrupted when the batter was mid-swing. fMRI analyses focused on the Post-Video fixation periods after each video (highlighted box). Thus, visual and auditory stimulation were matched across Full and Interrupted conditions, allowing us to compare Post-Video neural activation while controlling for perceptual input. C) During the Test session, participants answered structured interview questions about all 70 videos, and were instructed to answer based on their memory of the Full video originally shown during encoding. Here we show example text illustrating the memory test format and scoring of correct details and false memories. The void response (“I don’t remember”) is not counted as a false memory. D) Overview of the experiment. All participants completed Encoding, Reactivation, and Test Phases of the study. The Reconsolidation group did the Test Phase 24 hours after Reactivation, whereas the Immediate control group did the Test Phase immediately after Reactivation, in order to investigate whether memory modification required a delay. Only the Reconsolidation group was scanned.

## 1 Results

### 2 Behavioral Results

3 We transcribed and scored memory tests for two key measures: number of unique *correct*  
4 *details* (Figure 2A) and *false memories* (Figure 2B). We also collected *confidence ratings* and  
5 scored the number of *forgotten videos* (Supplemental Material, Confidence and Forgetting)  
6 (Supplementary Figure 1). We defined false memories as distorted details that the participant  
7 recalled from the episode (e.g., “The pitcher wore a green hat”). Void responses (e.g., “I don’t  
8 remember”) were not counted as false memories, but were missed opportunities to earn points  
9 for correct details. We conducted linear mixed-effects regression to predict memory outcomes  
10 from the fixed factors *group* (Reconsolidation and Immediate) and *reactivation type* (Full and  
11 Interrupted). In all models, we included random effects to account for by-subject and by-video  
12 variability (Methods, Linear Mixed Effects Regression).

1 ***Correct Details***

2 We found that prediction errors during memory reactivation enhanced recall of correct  
3 details (Figure 2A), such that participants in both groups reported more correct details for  
4 Interrupted videos than Full videos,  $F_{(1,69)} = 7.59, p = .007, 95\% \text{ CI } [-0.12, -0.02]$   
5 (Supplementary Table 1). Even though the video endings were omitted, prediction errors  
6 strengthened and preserved existing memories. Participants in the Reconsolidation group  
7 recalled fewer correct details than participants in the Immediate group,  $F_{(1,46)} = 4.69, p = .036,$   
8  $95\% \text{ CI: } [0.02, 0.31]$ , likely because the Reconsolidation group completed the memory test after  
9 a 24-hour delay. There was no interaction between group and reactivation type,  $F_{(1,248)} = 0.48, p$   
10  $= .488, 95\% \text{ CI } [-0.04, 0.02]$ , indicating that the effect of prediction error enhancing correct  
11 details did not require a delay.

12 ***False Memories***

13 We found that prediction errors selectively increased false memories after a 24-hour  
14 delay in the Reconsolidation group, replicating our past behavioral results (38) (significant  
15 interaction between reactivation type and group,  $F_{(1,1067)} = 6.76, p = .009, 95\% \text{ CI } [0.01, 0.07]$ ,  
16 Figure 2B, Supplementary Table 1). In other words, Interrupted videos increased false memories  
17 in the Reconsolidation group ( $t(23) = -4.84, p < .001$ ), but not the Immediate group ( $t(23) = -$   
18  $0.88, p = .387$ ). We also found main effects of group,  $F_{(1,46)} = 105.07, p < .0001, 95\% \text{ CI } [-0.43, -$   
19  $0.29]$ , and reactivation type,  $F_{(1,341)} = 10.80, p = .001, 95\% \text{ CI } [-0.08, -0.02]$ , both driven by the  
20 effect of prediction error increasing false memories in the Reconsolidation group.

21 In sum, our behavioral results showed a novel dissociation between reinforcing and  
22 updating memories: Prediction errors during memory reactivation strengthened memories

1 immediately, but updating memories to add new information required a delay, as predicted by  
2 reconsolidation theory.

### 3 *Item Analysis: Surprise Ratings and Semantic Similarity*

4 Expanding on the results reported above, we recruited an independent sample to watch  
5 the videos and rate (on a 5-point Likert scale) the degree of surprise elicited by the narrative  
6 interruptions (Methods, Online Video Ratings). We found that surprise ratings were unrelated to  
7 correct details (Supplementary Table 2), but there was a significant interaction between surprise  
8 ratings and group, such that more surprising videos were associated with more false memories  
9 selectively in the Reconsolidation group,  $F_{(1,2994)} = 4.28, p = .039, 95\% \text{ CI } [-0.06, -0.01]$ .

Here, we use false memories as an index of memory updating; however, incorporating relevant new information into memory can be an adaptive function. We hypothesized that our paradigm would induce false memories because information would be integrated across semantically-related episodes. To test this hypothesis, we quantified semantic similarity among the 70 videos with a text-based analysis (Methods, Memory Tests) (Supplementary Figure 2). Videos that were more semantically similar to other videos in the stimulus set yielded more false memories,  $F_{(1,68)} = 7.03, p = .010, 95\% \text{ CI } [0.03, 0.17]$  (Supplementary Table 3). Semantic similarity did not predict correct details overall,  $F_{(1,67)} = 0.09, p = .769, 95\% \text{ CI } [-0.05, 0.04]$ , but showed a significant interaction with reactivation type,  $F_{(1,68)} = 8.22, p = .006, 95\% \text{ CI } [0.02, 0.11]$ . For Full videos, semantic similarity was positively associated with correct details, consistent with schema-based memory benefits (54). For Interrupted videos, semantic similarity was negatively related to correct details, suggesting a trade-off with false memories. Overall, these results suggest that memories were updated with relevant new information, exactly as required for adaptive behavior.

## Prediction Error Drives Memory Strengthening and Updating

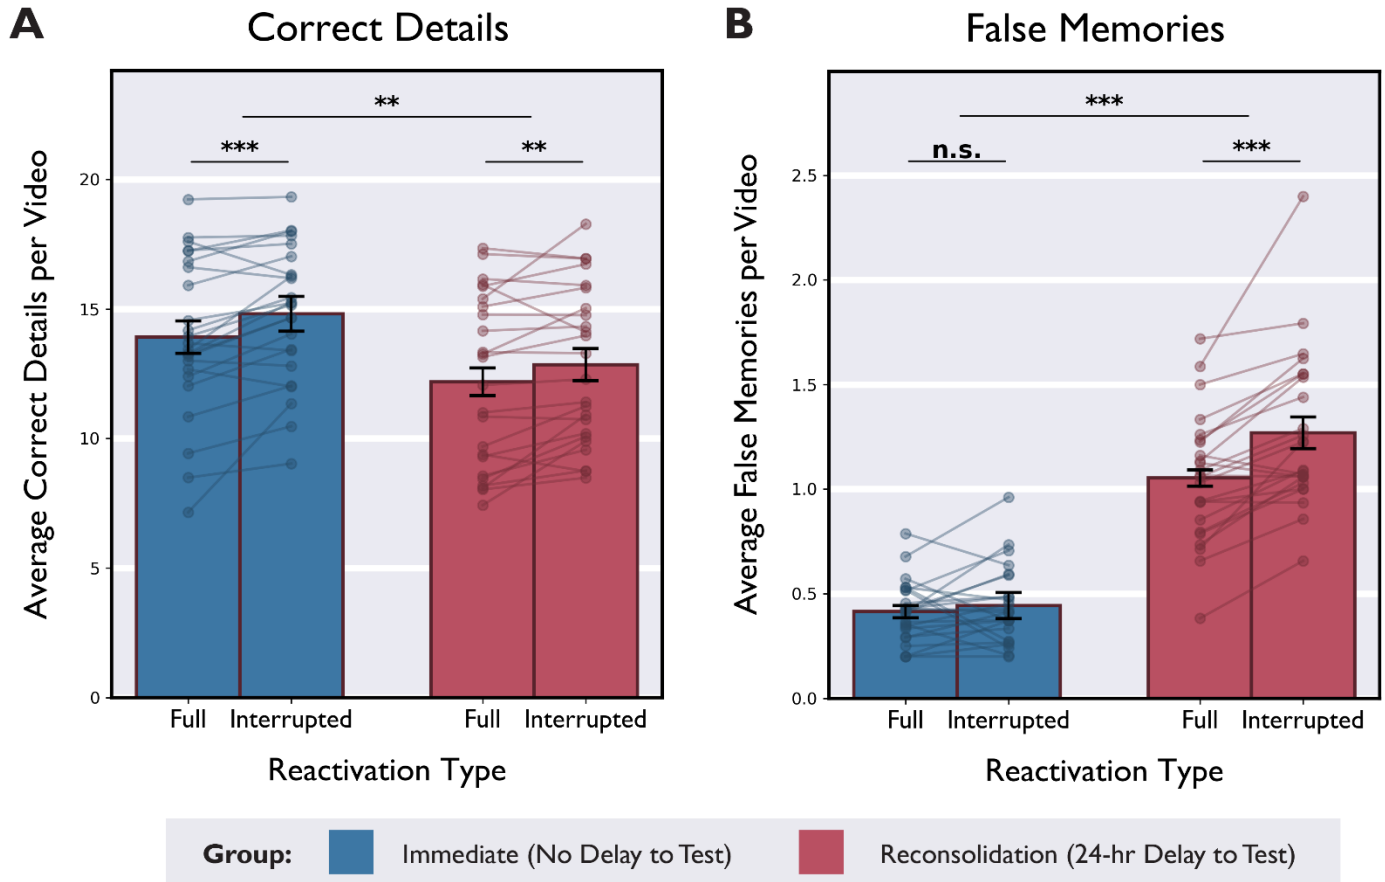

*Figure 2.* Prediction errors strengthened and updated memories over distinct time-courses. A) In both groups, average Correct Details were higher for videos that were Interrupted during memory reactivation, demonstrating that prediction error can strengthen memory recall both immediately and after a delay. B) Only in the Reconsolidation group (24-hour delay-to-test), average False Memories were higher for videos that were Interrupted during memory reactivation. This interaction demonstrates that prediction error enabled memory updating, but only after a delay that permitted reconsolidation. Dots indicate average scores by-participant, and lines connect within-subjects measures. Error bars depict 95% confidence intervals. \*  $p < .05$ , \*\*  $p < .01$ , \*\*\*  $p < .001$ .

## 1 **Univariate fMRI Results**

2 The primary aim of our univariate fMRI analyses was to test the following questions:

- 3 1. Is hippocampal activation related to *reactivation type* (Full vs. Interrupted) and  
4 memory updating as indexed by subsequent *false memories*?
- 5 2. If so, does activation in the *basal forebrain* or the *VTA* moderate the relationship  
6 between hippocampal activation and memory updating?

7 We analyzed the blood oxygen level-dependent (BOLD) signal from the 24 subjects in  
8 the Reconsolidation group (the Immediate group was not scanned). Our analyses focused on the  
9 fixation screen presented during the Post-Video period immediately after each video offset. The  
10 narrative ending of each video was either as-expected (Full) or a surprising prediction error  
11 (Interrupted). We controlled for visual and auditory input across conditions by analyzing neural  
12 activation during the Post-Video fixation period (Figure 2B). Whole-brain mass univariate  
13 results are provided in the Supplemental Material (Whole-Brain Analysis, Supplementary Table  
14 4, Supplementary Figure 3).

15 Some past studies have shown that prediction error signals are stronger in left  
16 hippocampus and anterior hippocampus (18, 20, 21, 55), whereas posterior hippocampus is more  
17 sensitive to video offsets (56). Other studies have shown that anterior and posterior hippocampus  
18 parse continuous experience at different timescales (57, 58). On the basis of these findings, we  
19 tested separate ROIs for left, right, anterior, and posterior hippocampus (Methods, ROI Masks),  
20 but found that our effects were generally very consistent across hippocampal ROIs  
21 (Supplemental Material, ROI Differences). Main text results are averaged across bilateral  
22 hippocampus, but results from individual ROIs are depicted in Supplementary Figures 4-9.

### 1 ***Relating Hippocampal Activation to Memory Updating***

2 We used single-trial modelling to relate post-video hippocampal activation to subsequent  
3 false memories. For our univariate analyses, we modelled a 2s impulse during the Post-Video  
4 period (fixation screen), convolved with the canonical double-gamma hemodynamic response  
5 function and phase-shifted 2s after video offset. This 2s shift targets the peak Post-Video  
6 hippocampal response identified in previous studies (59, 60). We isolated fMRI activation during  
7 the Post-Video period on each trial and averaged parameter estimates across all hippocampal  
8 voxels (Methods, fMRI Data Analysis). Using linear mixed-effects regression, we predicted trial-  
9 wise hippocampal activation from the following variables: *reactivation type* (Full vs.  
10 Interrupted), *false memories* (continuous measure), and their interaction.

11 We found a significant interaction between reactivation type and subsequent false  
12 memories associated with hippocampal activation,  $F_{(1,1271)} = 8.54, p = .004, 95\% \text{ CI } [-0.13, -$   
13  $0.03]$  (Figure 3A) (Supplementary Table 5A). After Full videos, greater hippocampal activation  
14 was associated with fewer subsequent false memories, consistent with the idea that the  
15 hippocampus reinforces memory for episodes that just concluded (Figure 3A, blue) (59–61).  
16 After an episode that aligns with expectations, the hippocampus should continue to generate  
17 ongoing predictions and protect a memory from distortion. However, when the ending of the  
18 video was surprising, we observed exactly the opposite effect. After Interrupted videos, greater  
19 hippocampal activation was associated with *more* false memories, consistent with the idea that  
20 surprising reminders destabilize memories and enable updating (Figure 3A, orange) (1).

### 21 ***Investigating the Role of the Basal Forebrain and Ventral Tegmental Area***

22 Next, we tested hypotheses about neuromodulatory mechanisms by examining activation  
23 in the basal forebrain (which contains the medial septal nucleus, the primary source of ACh in



1 the hippocampus) (28, 30, 42) and the VTA (which contains dopaminergic neurons that project  
2 to the hippocampus) (16, 23). We added two parameters to the model reported above to examine  
3 average basal forebrain and VTA activation during the Post-Video period (i.e., single-trial  
4 activation estimates in the basal forebrain and VTA for the 2-second target period of the fixation,  
5 consistent with modelling of hippocampal activation), as well as interactions with hippocampal  
6 activation, reactivation type, and subsequent false memories. All model parameters are listed in  
7 Supplementary Table 5B.

8 We found that basal forebrain activation was significantly positively related to  
9 hippocampal activation during the Post-Video period,  $F_{(1,1380)} = 9.80$ ,  $p = .002$ , 95% CI [0.03,  
10 0.14]. There was also a significant three-way interaction among basal forebrain activation,  
11 reactivation type, and false memories predicting hippocampal activation,  $F_{(1,1392)} = 7.68$ ,  $p =$   
12  $.006$ , 95% CI [-0.13, -0.02] (Figure 3B). This interaction demonstrated that the relationship  
13 between hippocampal activation and subsequent memory (Figure 3A) was only evident when the  
14 basal forebrain was also activated (Figure 3B, right). When basal forebrain activation was weak,  
15 hippocampal activation was unrelated to memory (Figure 3B, left). VTA activation was also  
16 positively related to hippocampal activation during the Post-Video period ( $F_{(1,1376)} = 21.74$ ,  $p <$   
17  $.001$ , 95% CI [0.07, 0.18]), but there was no interaction among VTA activation, reactivation  
18 type, and false memories ( $F_{(1,1375)} = 0.02$ ,  $p = .876$ , 95% CI [-0.06, 0.05]), demonstrating that the  
19 VTA did not moderate the effect of hippocampal activation on memory.



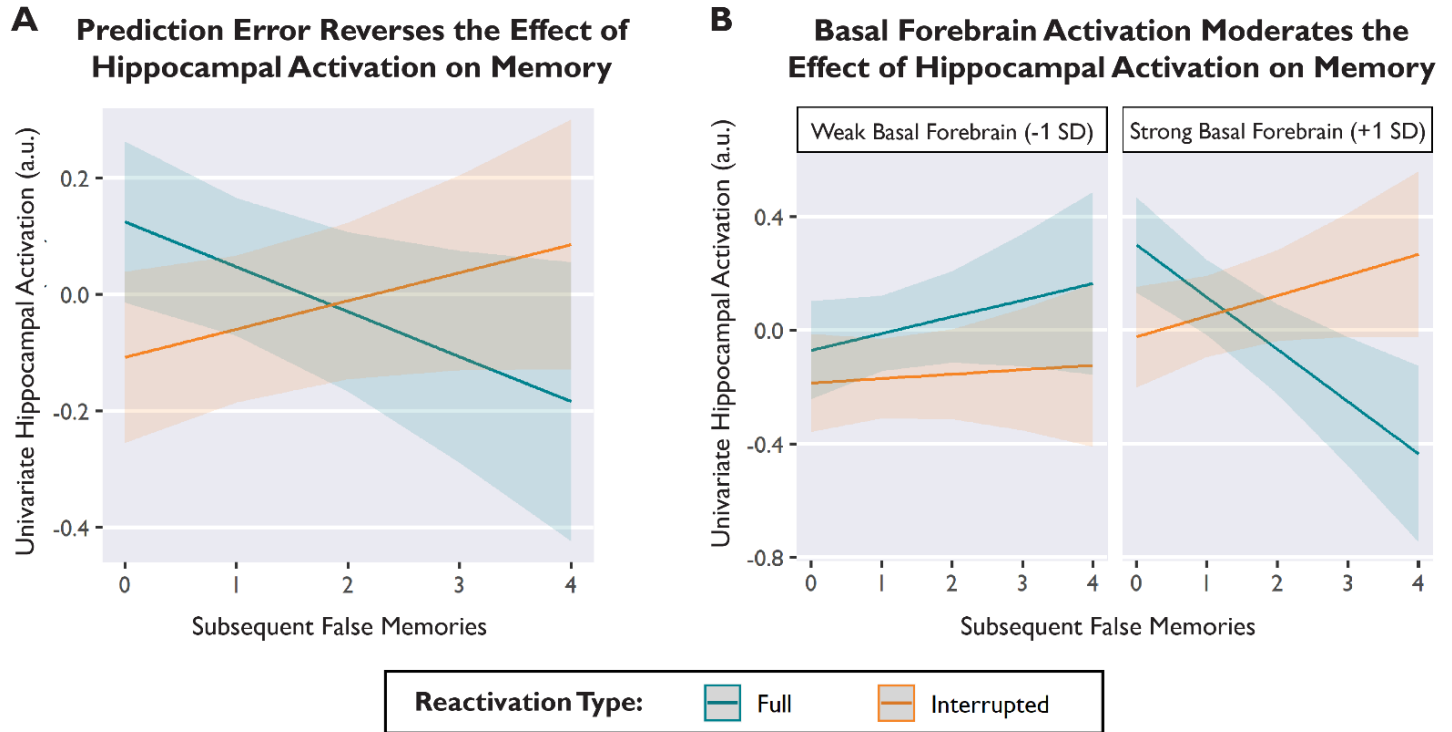

*Figure 3.* Prediction error reverses the relationship between hippocampal activation and subsequent memory, and this effect depends on concurrent basal forebrain activation. A) After Full-length videos, greater hippocampal activation had a protective effect, predicting fewer false memories (blue). After Interrupted videos, greater hippocampal activation predicted more false memories (orange). B) The effect of prediction error on hippocampal activation and memory was only observed when basal forebrain activation was strong (right). When basal forebrain activation was weak, hippocampal activation was unrelated to memory (left). Basal forebrain activation is binned (weak vs. strong) for visualization, but statistical models used a continuous variable. Lines depict model-predicted estimates, and shaded bands depict the 95% confidence interval. Model-predicted estimates are shown instead of individual data points in order to show within-subjects effects, while controlling for subject and stimulus variance.

### 1 *Prediction Error Changes the Role of the Hippocampus*

2 Overall, our results suggest that prediction error altered hippocampal processing and thus  
3 determined the fate of episodic memories. Past studies only showed that hippocampal activation  
4 *increased* after prediction errors (18–21, 62), and did not examine the consequences for  
5 subsequent memory. Crucially, we found that the same amount of hippocampal activation could

1 predict opposing effects on memory depending on whether video endings aligned with  
2 expectations. We investigated the mechanisms underlying this surprising finding by examining  
3 functional connectivity with neuromodulatory regions; we found that the relationship between  
4 hippocampal activation and memory depended on concurrent basal forebrain activation,  
5 supporting the idea that acetylcholine regulates hippocampal processing.

6       How does prediction error change hippocampal processing? We propose that during  
7 memory reactivation (i.e., video playback), the hippocampus retrieves a past memory, generates  
8 predictions, and checks for a mnemonic prediction error. If no prediction error is detected, then  
9 the hippocampus supports memory *preservation*, reinforcing details from within the episode and  
10 thus protecting a memory from change (i.e., preventing false memories). If a prediction error is  
11 detected, then the hippocampus supports memory *updating*, abandoning ongoing predictions and  
12 destabilizing a memory to incorporate new information (i.e., increasing false memories).  
13 Cholinergic modulation from the basal forebrain could regulate this shift in hippocampal  
14 processing, thus influencing memory. In the following section, we test mechanistic predictions of  
15 this account.

### **Multivariate fMRI Results**

16       On the basis of our univariate findings, we proposed that the hippocampus continually  
17 generates predictions and sustains representations during ongoing episodes (63, 64), but that  
18 prediction errors can trigger the hippocampus to abandon these sustained representations and  
19 update memories (27, 28). Therefore, we hypothesized that prediction errors would disrupt  
20 sustained representations in the hippocampus; that these effects would be specific to the  
21 hippocampus; and that disrupting hippocampal representations would lead to memory updating.  
22 Mechanistically, we predicted that activation in the basal forebrain and/or VTA would link

1 hippocampal representations to memory outcomes, via neuromodulation of hippocampal  
2 processing (23–28, 36, 51, 52).

3 The goal of our multivariate analyses was to test the following questions:

- 4 1. Are hippocampal representations sustained during and after narrative episodes?
- 5 2. Do prediction errors disrupt sustained hippocampal representations?
- 6 3. Does univariate activation in the basal forebrain or VTA link hippocampal  
7 representations to memory updating?

### 8 *Autocorrelation During and After Videos*

9 Past studies in rodents and humans have used *autocorrelation* measures, which quantify  
10 similarity across neural patterns, to investigate hippocampal representations during naturalistic  
11 tasks (57, 58). *Temporal autocorrelation* is an index of multivariate information that is preserved  
12 over time; this measures moment-to-moment overlap of activation patterns (57, 64, 65).  
13 Intracranial recordings in humans have shown that temporal autocorrelation in the hippocampus  
14 ramps up over the course of familiar episodes (64). Ramping autocorrelation reflects sustained  
15 neural representations, here consistent with the hippocampus generating predictions and  
16 anticipating upcoming stimuli (63, 64). To test whether hippocampal representations were  
17 sustained or disrupted over time, we calculated temporal autocorrelation by correlating the  
18 activation of all voxels within the hippocampus at timepoint  $T$  with the activation pattern at  
19 timepoint  $T+1$  sec (Methods, Multivariate fMRI Analyses). We predicted that hippocampal  
20 representations would be sustained after Full videos (increasing autocorrelation), but disrupted  
21 after Interrupted videos.

22 Using linear mixed effects regression, we found that hippocampal autocorrelation  
23 increased linearly as videos progressed, ( $F_{(1,7379)} = 8.41, p = .004, 95\% \text{ CI } [0.01, 0.04]$ , Figure

1 4A, Supplementary Table 6A), suggesting that episodic representations were sustained and  
2 stabilized during video playback (64). Plotting second-by-second autocorrelation values revealed  
3 that autocorrelation trajectories for Full and Interrupted videos diverged at the moment of video  
4 offset (Figure 4B): after Full videos, hippocampal representations were sustained during the  
5 Post-Video period, whereas after Interrupted videos, hippocampal representations were  
6 disrupted. To quantify this Post-Video shift in hippocampal representations, we analyzed the  
7 average change in autocorrelation from the factors *segment* (before or after video offset),  
8 *reactivation type* (Full or Interrupted), and their interaction term (Supplementary Table 6B).  
9 There was a significant interaction between segment and reactivation type predicting change in  
10 autocorrelation ( $F_{(1,2818)} = 13.24, p < .001, 95\% \text{ CI } [0.03, 0.11]$ ), such that autocorrelation  
11 increased more for Full than Interrupted videos during the Post-Video period (Figure 4C). In  
12 other words, prediction errors disrupted the continuity of hippocampal representations.

### Hippocampal Representations are Sustained or Disrupted Over Time

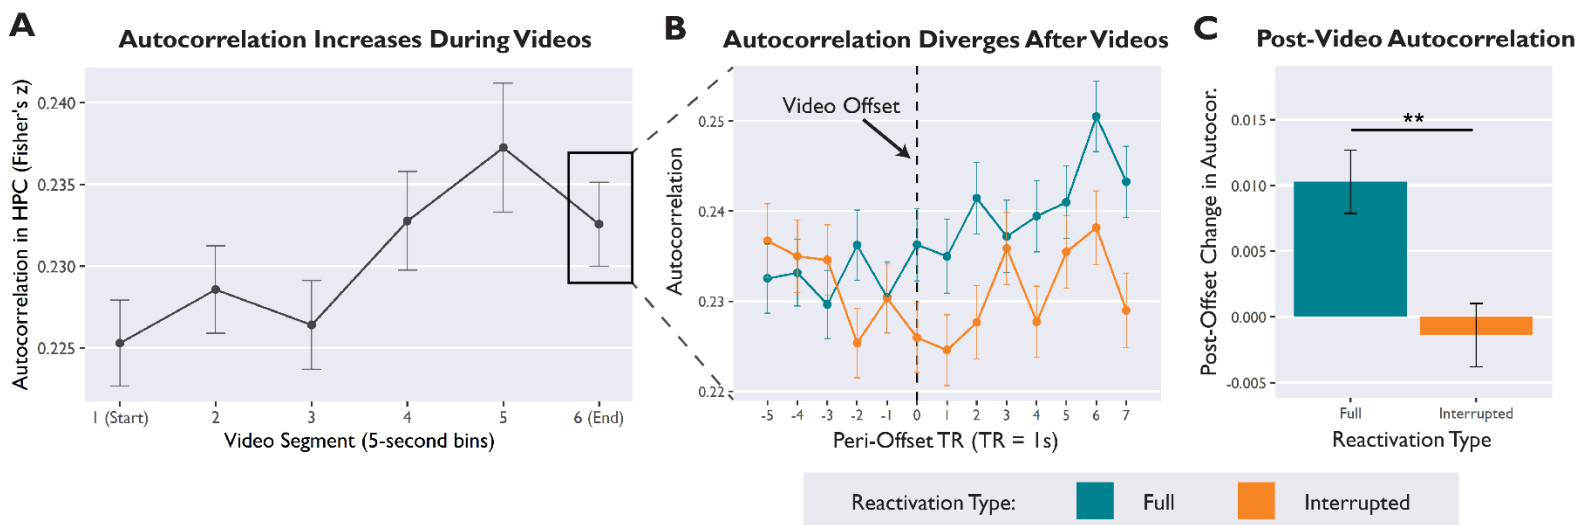

*Figure 4.* Hippocampal representations are sustained or disrupted over time, depending on whether or not episodes align with expectations. A) Temporal autocorrelation in the hippocampus gradually increased over the course of a video, suggesting that episodic representations were sustained over time. Autocorrelation values were averaged over 5-second

bins of video playback. B) Autocorrelation trajectories for Full and Interrupted videos diverged during the Post-Video period. Plot visualizes second-by-second autocorrelation values in the hippocampus, time-locked to the moment of video offset (black dotted line). C) Average Post-Video change in autocorrelation (average autocorrelation scores for the 5-sec bin immediately *after* video offset, minus average autocorrelation for the bin immediately *before* offset). Hippocampal representations were sustained after Full videos, but disrupted after Interrupted videos. Error bars depict SEM.

### 1 ***Relating Autocorrelation to Subsequent Memory***

2           Next, we tested whether disruption of hippocampal representations predicted memory  
3 updating. Using linear mixed effects regression, we predicted false memories from the  
4 interaction between reactivation type and Post-Video change in autocorrelation, including  
5 univariate hippocampal activation as a continuous covariate (thus controlling for any  
6 autocorrelation effects that are a consequence of univariate activation). We found a significant  
7 interaction between reactivation type and change in autocorrelation predicting false memories,  
8  $F_{(1,1349)} = 5.84, p = .016, 95\% \text{ CI } [0.01, 0.11]$  (Figure 5A, Supplementary Table 7A). After  
9 Interrupted videos, disrupting hippocampal representations led to memory updating. Conversely,  
10 after Full videos, hippocampal autocorrelation was unrelated to memory.

11           What determines whether hippocampal representations are sustained or disrupted? To  
12 investigate candidate neuromodulatory mechanisms, we extended the model described above  
13 (predicting false memories from reactivation type, change in autocorrelation, and univariate  
14 activation in the hippocampus) to include univariate activation in the basal forebrain and the  
15 VTA (continuous variables). The model included all relevant interaction terms, reported in full in  
16 Supplementary Table 7B. Paralleling our univariate findings, we found a significant three-way  
17 interaction among basal forebrain activation, reactivation type, and hippocampal autocorrelation  
18 that predicted subsequent false memories,  $F_{(1,1338)} = 4.56, p = .033, 95\% \text{ CI } [0.01, 0.09]$  (Figure

1 5B). In other words, prediction errors disrupted hippocampal representations and led to memory  
2 updating, but only when the basal forebrain was also activated (Figure 5B, right). In contrast, the  
3 three-way interaction among VTA activation, reactivation type, and hippocampal autocorrelation  
4 was not significant,  $F_{(1,1352)} = 0.02$ ,  $p = .894$ , 95% CI [-0.04, 0.05]. Overall, we found that our  
5 autocorrelation results paralleled our univariate findings; basal forebrain activation was crucial  
6 for connecting hippocampal representations to memory outcomes.

7       Lastly, to determine the anatomical specificity of our autocorrelation findings, we tested  
8 two control regions: inferior lateral occipital cortex (LOC) and white matter. We predicted that  
9 autocorrelation in LOC would be sensitive to all video offsets because of the change in visual  
10 input, but *not* sensitive to prediction error. In contrast, physiological noise from white matter  
11 should not be sensitive to either video offsets or prediction errors. Autocorrelation in LOC  
12 significantly increased after videos ( $t(23) = 9.47$ ,  $p < .001$ , Cohen's  $d = 1.37$ ), but did not differ  
13 by reactivation type ( $t(23) = -0.05$ ,  $p < .96$ , Cohen's  $d = 0.01$ ). Autocorrelation in white matter  
14 did not change post-offset ( $t(23) = 0.99$ ,  $p = .329$ , Cohen's  $d = 0.14$ ) and did not differ by  
15 reactivation type ( $t(23) = 0.86$ ,  $p = .40$ , Cohen's  $d = 0.18$ ). In summary, these control analyses  
16 indicated that our autocorrelation findings were not a brain-wide phenomenon; prediction error  
17 selectively disrupted sustained representations in the hippocampus.

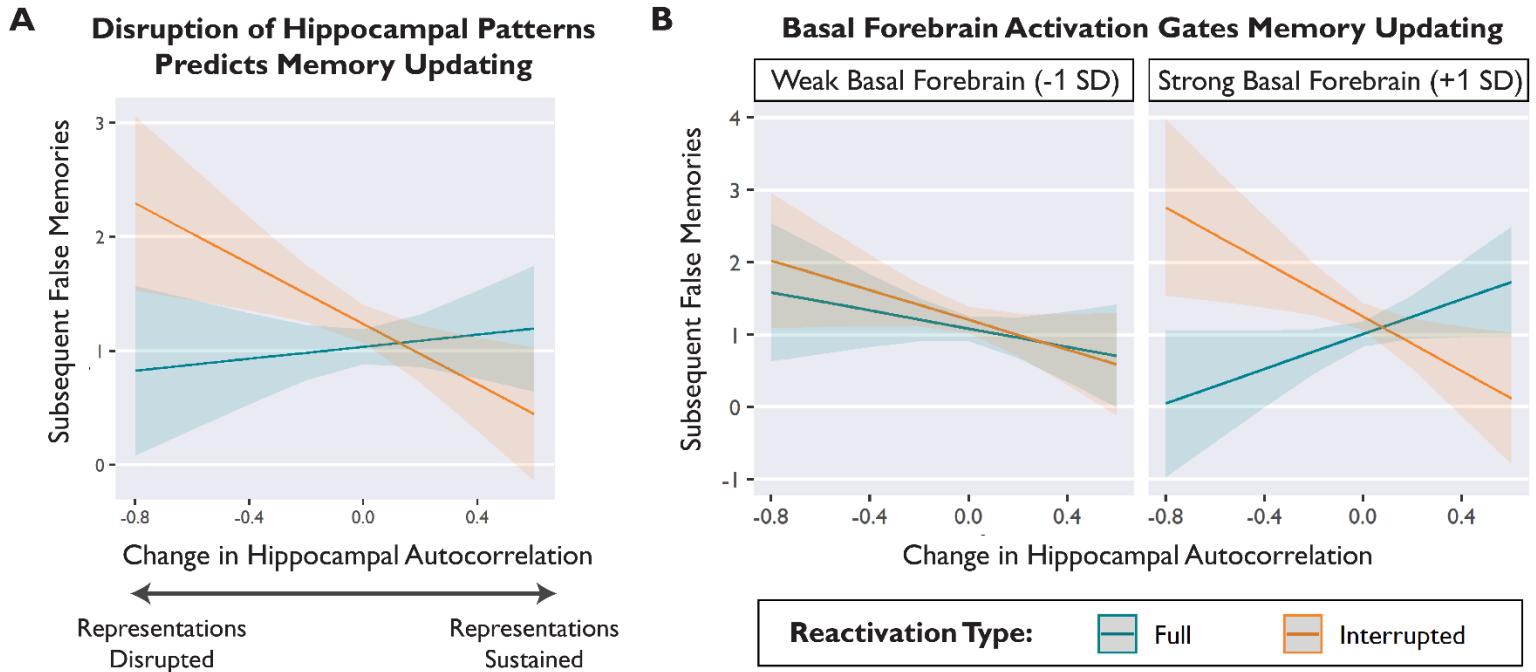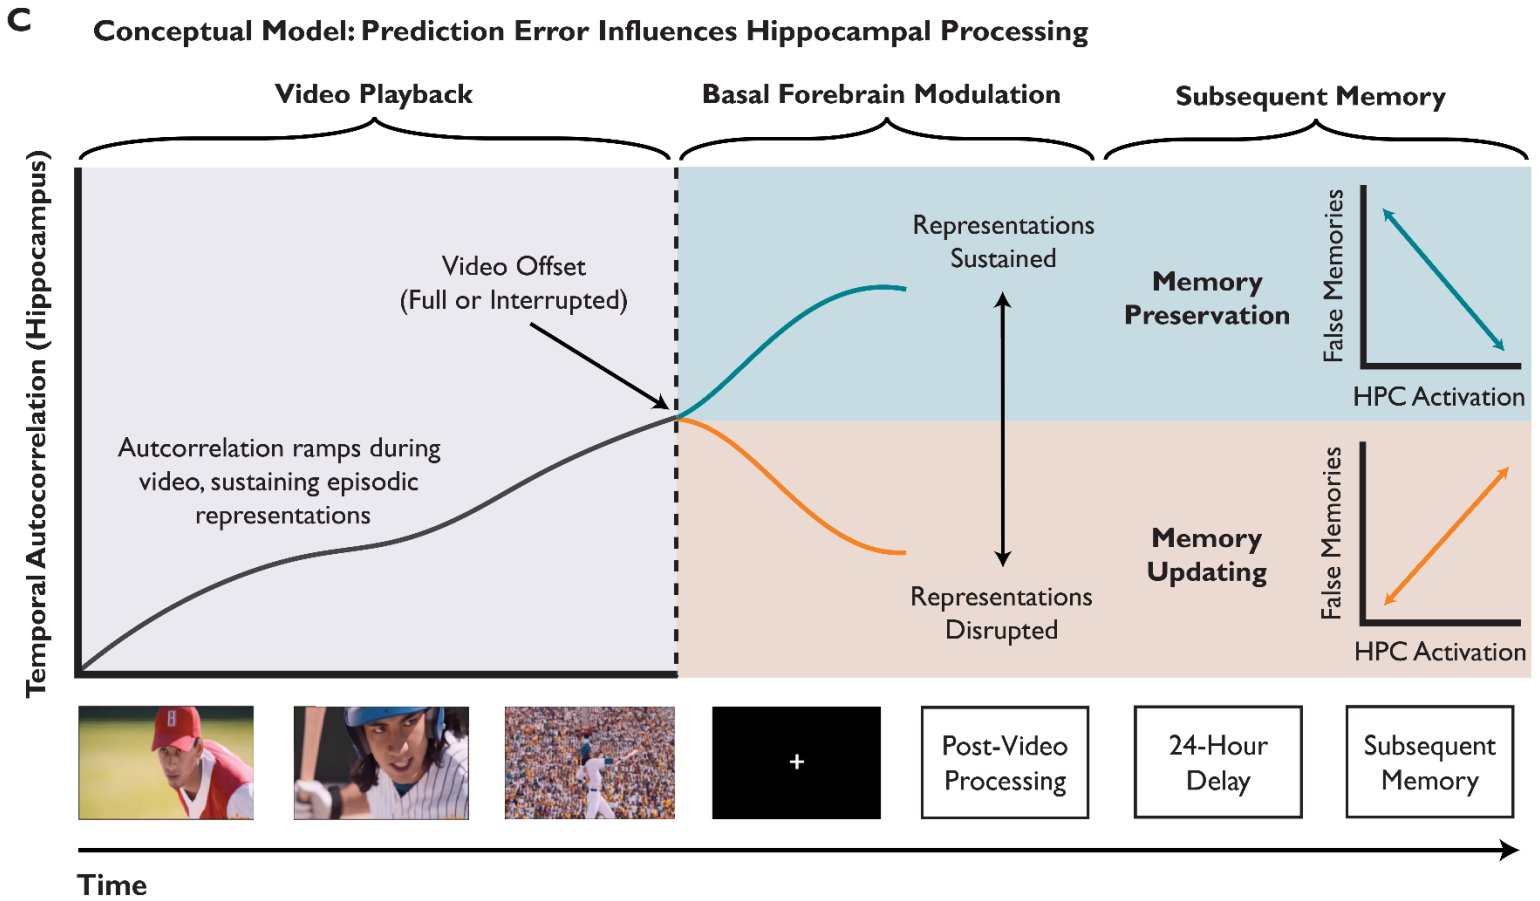

*Figure 5.* Prediction errors elicited by Interrupted videos disrupt sustained hippocampal representations, and this disruption predicts memory updating. A) Estimated values from a linear regression model predicting subsequent false memories from the interaction of reactivation type and change in autocorrelation. After Interrupted videos, decreases in autocorrelation were related to increased memory updating. B) The effect of prediction error on hippocampal autocorrelation and subsequent memory depended on concurrent basal forebrain activation. Basal forebrain activation was binned (weak vs. strong) for visualization, but statistical models used a continuous variable. Shaded bands depict 95% confidence intervals around the regression line. In panels A and B, model-predicted estimates are depicted instead of individual data points in order to show within-subject effects, while controlling for subject and stimulus variability. C) Conceptual schematic depicting the effect of prediction error on hippocampal representations and subsequent memory. During a video, the hippocampus sustains episodic representations over time, consistent with generating ongoing predictions. After video offset, preservation or disruption of these representations indicates whether the hippocampus switches to an internal processing mode, whereby univariate activation preserves memories, or an external processing mode, whereby univariate activation updates memories. The link between prediction error and memory outcomes depended on co-activation of the hippocampus and basal forebrain during the post-video period.

## Discussion

1           Here, we show that prediction errors modulate the function of the hippocampus and allow  
2 memories to be updated with relevant new information. In our fMRI paradigm, we elicited  
3 mnemonic prediction errors by interrupting familiar narrative videos immediately before the  
4 expected conclusions. Prediction errors reversed the relationship between univariate  
5 hippocampal activation and subsequent memory: After expected video endings, hippocampal  
6 activation was associated with memory preservation, but after prediction errors, hippocampal  
7 activation was associated with memory updating. Tracking the stability of hippocampal  
8 representations revealed that prediction errors disrupted activation patterns; this pattern  
9 disruption predicted memory updating. Crucially, the association between hippocampal  
10 activation (both univariate and multivariate) and memory outcomes depended on concurrent  
11 basal forebrain activation during the Post-Video period. We conclude that prediction error,



1 coupled with basal forebrain modulation, prompts the hippocampus to abandon ongoing  
2 predictions and prepare to update a memory with new information (Figure 5B).

### 3 **Prediction Errors Disrupt Hippocampal Representations and Update Memories**

4 Past studies of mnemonic prediction errors have reported an increase in univariate  
5 hippocampal activation, but have not examined whether this neural signal affects memory (17–  
6 19, 62). For the first time, we show that after prediction errors, hippocampal activation leads to  
7 memory updating. Crucially, we demonstrate that univariate measures are *insufficient* for  
8 understanding the effect of prediction error on the hippocampus, because the same amount of  
9 hippocampal activation can exert opposing effects on memory. Prediction error reversed the  
10 relationship between hippocampal activation and subsequent memory, consistent with a shift in  
11 hippocampal processing (Figure 3). After expected endings (Full videos), hippocampal activation  
12 protected against false memories, consistent with the idea that the hippocampus reinforces  
13 memory after the conclusion of an episode (59, 60). After surprising endings (Interrupted  
14 videos), hippocampal activation predicted *more* false memories, consistent with the idea that  
15 prediction errors can destabilize memories and enable updating with new information (1–3).

16 To test the idea that prediction errors influence hippocampal processing, we tracked  
17 hippocampal activation patterns to examine how episodic representations were sustained or  
18 disrupted over time. We used *temporal autocorrelation* (the moment-to-moment overlap of  
19 activation patterns) as a measure of continuity in hippocampal representations (57, 64, 65). As  
20 narratives progressed, autocorrelation increased, reflecting stability and continuity; this increase  
21 in autocorrelation suggested that the hippocampus generated predictions (63, 64) and sustained  
22 episodic representations over time (59, 66) (Figure 4A). Crucially, prediction errors disrupted the  
23 stability of hippocampal representations (Figure 4B, 4C), and this disruption predicted the degree

1 of memory updating (Figure 5A). Overall, we propose that disruption of hippocampal patterns  
2 indicates a shift in processing: Prediction error prompts the hippocampus to abandon ongoing  
3 predictions and prepare to update a memory (Figure 5B). Our findings substantially advance past  
4 research (17, 18, 62): We link hippocampal prediction error signals to memory updating, show  
5 that prediction error reverses the relationship between hippocampal activation and memory  
6 outcomes, and uncover mechanisms of this shift in hippocampal processing.

### 7 **Basal Forebrain Activation Relates to Hippocampal Processing**

8 Past studies have argued that either cholinergic (26–28, 40–42, 51) or dopaminergic (16,  
9 23, 52) modulation of the hippocampus could enhance plasticity after prediction error. However,  
10 mixed evidence supporting both hypotheses has left the question unresolved (24, 25, 30, 36, 39).  
11 Here, we investigated whether activation of the basal forebrain or the VTA could explain the  
12 relationship between hippocampal activation and subsequent memory. We found that the effect  
13 of prediction error on memory depended on co-activation of the hippocampus and basal  
14 forebrain, suggesting that cholinergic modulation is important for shifting hippocampal  
15 processing. Hippocampal activation was associated with memory updating after prediction  
16 errors, but only when the basal forebrain was also activated. Likewise, disrupting hippocampal  
17 representations led to memory updating after prediction errors, but only when the basal forebrain  
18 was also activated. Overall, our results support the idea that cholinergic modulation gates  
19 memory updating and influences hippocampal processing.

20 Our findings also offer new insight into the functional connections between the VTA and  
21 hippocampus. Although we found a robust positive correlation between VTA and hippocampal  
22 activation during the Post-Video period, VTA activation was unrelated to prediction error and  
23 did not link hippocampal activation with memory updating. These findings are consistent with

1 our prior proposal that connectivity between the VTA and hippocampus reflects modulation of  
2 hippocampal learning states by sustained VTA activity (16, 69) rather than phasic VTA  
3 responses (25, 70–72). However, our paradigm was optimized for detecting memory updating  
4 instead of midbrain prediction error responses. It is also possible that prediction error signals  
5 could be transmitted to the hippocampus from the locus coeruleus (71, 72). Analyses of locus  
6 coeruleus in the current data did not reveal any relationships. Future research could disambiguate  
7 the roles of the basal forebrain, VTA, and locus coeruleus by examining both event-related and  
8 sustained connectivity with the hippocampus and their consequences for memory.

### 9 **Prediction Error Both Strengthens and Updates Memories**

10 Our behavioral results demonstrated a novel dissociation: prediction error both  
11 strengthened and updated memories, but over distinct timecourses (Figure 2). Prediction error  
12 increased the number of correct details recalled, both immediately and after a one-day delay. In  
13 contrast, prediction error increased false memories only after a delay, supporting that idea that  
14 reconsolidation enables memory updating (1, 53, 73). The finding that prediction error also  
15 increased correct details demonstrated that the false memories arose from an adaptive updating  
16 mechanism, not forgetting.

17 In the present study, we used false memories as an index of memory updating; in the real  
18 world, it is adaptive to update memories with relevant new information. In our paradigm,  
19 interference from other stimulus videos likely produced false memories because information was  
20 integrated across videos. Previously, we found that prediction errors selectively updated  
21 memories with semantically-related information from interference videos (38). Here, we showed  
22 that videos that shared greater semantic similarity with the rest of the stimulus set produced more  
23 false memories (Supplementary Table 3). Memories could be updated with semantically-related

1 details that arise from reactivation of related memories, or visual input from subsequent videos  
2 during the task. This finding accords with reconsolidation research (1, 53, 74) and computational  
3 models of event segmentation (75, 76), which have both shown that interference among related  
4 episodes can produce false memories after prediction error. However, memory updating is  
5 beneficial in other situations that require integrating old and new knowledge, or correcting  
6 erroneous information.

### 7 **Limitations and Future Directions**

8       Our experimental design was inspired by reconsolidation theory, but evidence for cellular  
9 reconsolidation processes in humans is lacking. Numerous behavioral studies have used  
10 reconsolidation-like paradigms to demonstrate memory malleability (4, 38, 53, 74), but it  
11 remains unknown whether the synaptic mechanisms of reconsolidation are consistent across  
12 animals and humans (1). We found that the effect of prediction error on memory updating  
13 required a delay, consistent with reconsolidation processes that rely on protein synthesis.  
14 Overall, our findings are broadly relevant to research on prediction error and memory even  
15 though the synaptic mechanisms remain unknown; reconsolidation theory offers one plausible  
16 framework for our results. Another limitation is that the present data lacked the spatial resolution  
17 required to segment hippocampal subfields, because we prioritized temporal resolution over  
18 spatial resolution in order to track rapid changes in hippocampal representations during and after  
19 naturalistic episodes.

20       We elicited prediction errors by interrupting videos before their expected narrative  
21 endings, comparable to the incomplete reminders (e.g., a conditioned stimulus without the  
22 expected outcome) that have been previously used in animal and human reconsolidation studies  
23 (1, 3, 74). However, it remains unknown whether a reminder must be *incomplete* in order to

1 initiate reconsolidation, or whether other surprising or novel stimuli (e.g., sounds, alternate  
2 endings) may also induce memory malleability. Incomplete reminders may be particularly  
3 effective because memory reactivation supports plasticity (77–79). Future studies could  
4 investigate memory reactivation by testing encoding-retrieval pattern similarity.

## 5 **Conclusion**

6       The brain continually generates predictions based on past experiences. When  
7 expectations do not align with reality, memories should be updated with relevant new  
8 information. We propose that prediction errors prompt the hippocampus to abandon ongoing  
9 predictions and update memories with relevant new information. In this way, surprise modulates  
10 hippocampal processing and determines the fate of episodic memories. This theoretical  
11 framework of memory updating bears implications for eyewitness testimony, education, and  
12 conditions like Post-Traumatic Stress Disorder. Beyond memory research, our results offer new  
13 insights for theories on the whole-brain predictive processes that govern attention, perception,  
14 action, and decision-making.

**Acknowledgements:** This research was funded by grants awarded to MDB from the *James S. McDonnell Foundation* (Scholar Award in Understanding Human Cognition) and the *Natural Sciences and Engineering Research Council* of Canada (Discovery Grant and Accelerator Supplement, RGPIN-2014-05959 and RGPIN-2020-05747). AHS has been supported by awards from the *National Science Foundation* (Graduate Research Fellowship) and *Natural Sciences and Engineering Research Council* of Canada (Postgraduate Doctoral Scholarship, Undergraduate Student Research Award). We also give thanks to Carolyn Chung, Tolulemi Gbile, and Aria Fallah for their invaluable contributions to data collection, transcription, and scoring.

**Author Contributions:** AHS and MDB developed the study design. AHS programmed the study, collected data, conducted analyses, and drafted the manuscript. GMM contributed substantially to data collection and IKB contributed to autocorrelation analyses. MDB and RAA contributed to the analysis approach and interpretation of results. All authors contributed to revising the manuscript and approved the final version.

**Declaration of Interests:** The authors have no competing interests to declare.

1 **Methods**

2 **Data, Code, and Materials**

3 Brief descriptions of the stimulus videos are provided in Supplementary Table 8. The full  
4 set of stimulus videos, along with derivative data and code necessary to reproduce results, are  
5 provided online in the project repository hosted by the Open Science Framework  
6 (<https://osf.io/xb7sq/>).

7 **Participants**

8 We recruited 55 participants from the University of Toronto community to participate in  
9 the study for monetary compensation (Reconsolidation group: \$70, Immediate control group:  
10 \$40). Of these participants, 7 were excluded (reasons stated below), leaving a final sample of 48  
11 participants. The sample size was determined *a priori* to satisfy the following conditions: (a)  
12 achieve at least 90% power to detect the interaction effect previously found with a variant of this  
13 paradigm ( $\eta_p^2 = 0.17$ ) (80), (b) reproduce the sample size previously used with a variant of this  
14 paradigm (38), and (c) evenly allocate participants to 6 pseudorandomized trial order lists.  
15 Inclusion criteria were as follows: between the ages of 18-30, normal or corrected-to-normal  
16 vision and hearing, no history of neurological or psychiatric disorders, and fluency in English.  
17 All participants provided informed consent prior to beginning the study. The study was approved  
18 by the University of Toronto Institutional Review Board, Protocol #00035787.

19 Participants were healthy young adults (age:  $M = 22.42$ ,  $SD = 2.41$ , range [18, 30];  
20 gender: 75% female, 25% male) with fluency in English, normal or corrected-to-normal vision  
21 and hearing, and no history of neurological or psychiatric disorders. fMRI participants were all  
22 right-handed. In consideration of the effects of sleep on consolidation, we also asked participants  
23 to report approximate hours of sleep over the course of the study. Participants slept an average of

1 7.28 hours ( $SD = 1.31$ ) between the Day 1 and Day 2 sessions, and Reconsolidation group  
2 participants slept an average of 7.02 hours ( $SD = 1$ ) between the Day 2 and Day 3 sessions.

### 3 **Stimuli**

4 Stimulus videos were sourced from movies, TV, and YouTube clips. We chose 70 videos  
5 that featured distinct narrative events (duration  $M = 30$  sec,  $SD = 7$  sec). Semantic similarity  
6 varied across videos (e.g., several videos featured sporting events), but there were no  
7 overlapping sources, settings, or characters. The stimulus set included 18 videos that were  
8 previously used in a behavioral version of the paradigm. During pilot testing, we ensured that the  
9 videos would be infrequently recognized by our participants. The 70 videos used in the  
10 experiment are described in Supplementary Table 8 and publicly available on the Open Science  
11 Framework (<https://osf.io/xb7sq/>). The Interrupted version of each video ended abruptly at the  
12 narrative climax, omitting the salient ending and violating expectations (duration  $M = 25$  sec,  $SD$   
13  $= 4$  sec).

14 For the fMRI version of the task (Reconsolidation group), stimuli were presented with  
15 EyeLink Experiment Builder (SR-Research) on a BOLDscreen display monitor (32",  
16 1920x1090, 100Hz refresh rate), viewed through a mirror attached to the head coil. Auditory  
17 stimulation was presented with in-ear MRI-compatible headphones (Sensimetrics, model S14).  
18 During the initial scout scan, we performed a sound test by playing the soundtrack of a movie  
19 trailer (not included in the stimulus videos) and adjusting the volume. For the behavioral version  
20 of the task (Immediate control group), videos were presented on a desktop computer and audio  
21 was presented with over-ear headphones.

### 22 **Procedure**



1           During the **Encoding session**, participants viewed all 70 videos in full-length form  
2 (randomized order). Each video was presented twice in a row to ensure that participants had  
3 strong expectations about the narrative outcomes for each video, a prerequisite for eliciting  
4 prediction error later.

5           During the **Reactivation session**, participants viewed each video again a single time.  
6 Half of the videos were Full and half of the videos were Interrupted. Videos were played in a  
7 pseudorandom order such that there were never more than two consecutive Interrupted videos.  
8 This pseudorandom presentation prevented participants from anticipating which videos would be  
9 interrupted. Participants were counterbalanced and sequentially assigned to one of six  
10 pseudorandom trial orders. We also performed eye-tracking during the Encoding and  
11 Reactivation sessions for participants in both the Reconsolidation and Immediate groups  
12 (EyeLink v.1000+, SR-Research). Eye-tracking was used to monitor alertness during the task,  
13 but these data are not discussed further.

14           Lastly, the **Test session** involved a structured interview-style recall test about details  
15 from each of the videos. Participants were cued with the name of each video and prompted to  
16 recall the narrative. The experimenter then probed the participant for more information with a  
17 pre-determined list of open-ended questions (e.g., “Can you describe the setting or context of the  
18 video?”, “Can you describe what the character looked like? Do you remember gender, age range,  
19 hair color, or clothing?”). Participants were instructed to answer based on their memory of the  
20 full-length videos that had been originally presented during encoding. Because we were  
21 interested in false memories as a measure of memory modification, we instructed participants not  
22 to guess and permitted them to skip details they could not recall.

1 Overall, the experiment took place over three days for participants in the Reconsolidation  
2 group (24-hour delays between Encoding, Reactivation, and Test), or over two days for  
3 participants in the Immediate control group (24-hour delay between Encoding and Reactivation,  
4 no delay between Reactivation and Test). Only the Reconsolidation group underwent  
5 neuroimaging.

6 Consistent with past reconsolidation studies (81–83), we maintained consistent contextual  
7 factors between Encoding, Reactivation, and Test sessions. Reconsolidation group participants  
8 completed the encoding session in a mock scanner (shell of a retired 1.5T Siemens Avanto  
9 scanner), while recorded MRI sounds were played in the background. Reconsolidation group  
10 participants completed the Reactivation session in the real fMRI scanner and the Test session at a  
11 desk in the mock scanner room. Participants in the Immediate control group completed all three  
12 sessions in the same behavioral testing room. In both groups, participants completed all three  
13 sessions with the same experimenter.

#### 14 **fMRI Scanning**

15 Scanning was performed with a 3T Siemens Prisma MRI scanner located at the Toronto  
16 Neuroimaging Center, University of Toronto. High-resolution functional images were collected  
17 with a T2\*-weighted multiband-accelerated echo-planar imaging (EPI) pulse sequence, and a 32-  
18 channel head coil. Foam padding was used to minimize head motion. We acquired whole-brain  
19 BOLD activation estimates with a spatial resolution of 2.7mm isotropic voxels (TR: 1000 ms,  
20 TE: 29 ms, flip angle: 50°, 60 slices at transversal orientation, phase encoding: A>P, FoV:  
21 210mm, Partial Fourier: 0.875, multiband factor: 4). High resolution T1-weighted anatomical  
22 images were acquired with a magnetization-prepared rapid-acquisition gradient-echo (MP-

1 RAGE) pulse sequence (voxel size: 1mm isotropic, TE: 24 ms, TR: 2000 ms, TI: 1100 ms, flip  
2 angle: 9°) to allow 3D reconstruction and volume-based statistical analysis.

### 3 **Scoring of Memory Tests**

4 We transcribed memory tests with *Temi*, an automated voice-to-text tool, then manually  
5 edited transcripts to verify accuracy (<https://www.temi.com/>). We coded videos as “forgotten” if  
6 the participant entirely failed to retrieve a memory when cued with the name of the video and a  
7 hint from a pre-determined list (brief descriptions of each video, provided in Supplementary  
8 Table 8). Scoring of details was conducted with *NVivo 12*, a program for qualitative analysis of  
9 transcripts. Research assistants manually labelled each detail as correct or false. Scorers were  
10 blinded to subject identity and reactivation type (Full vs. Interrupted) while scoring the memory  
11 tests. The number of false memories per-trial ranged from 0-6, but there were very few trials  
12 with 5 or 6 false memories. To account for these high outliers, we winsorized the false memories  
13 variable to the 95<sup>th</sup> percentile (4 false memories). Winsorizing improved model fits but did not  
14 affect the statistical significance of our results.

15 Lastly, we quantified semantic similarity among the videos by using the Cluster Analysis  
16 function in *NVivo*. Across all transcripts, we pooled the phrases used to describe each video,  
17 excluding false memories and irrelevant words (e.g., *the, um, and, maybe, confidence,*  
18 *remember*). We then calculated pairwise Pearson correlations on the basis of the most frequent  
19 100 words used to describe each video. For each video, we calculated an overall semantic  
20 similarity score by averaging the correlation values; this metric summarizes how much the  
21 content of a given video relates to the rest of the stimulus set. A heatmap displaying all pairwise  
22 correlation values is provided in Supplementary Figure 2.

### 23 **Online Ratings of Stimulus Videos**

1           We recruited 3,913 participants online using Amazon’s Mechanical Turk. Participants  
2 were paid \$0.50 to complete a Qualtrics survey that took approximately 3 minutes. Each  
3 participant was randomly assigned to view one stimulus video, first as the Full version and then  
4 as the Interrupted version. We included timing constraints to ensure that participants could not  
5 progress to the next page of the survey before the video had finished playing. Participants were  
6 excluded for the following reasons: (1) they failed the attention check question (“If you are  
7 paying attention, choose 4 below.”), (2) they failed the comprehension check question (“In  
8 general, not just in the video, is the emotion ‘happiness’ positive or negative?”), (3) they reported  
9 that they had experienced playback issues, or (4) they reported that they had seen the video clip  
10 prior to the survey. After exclusions, our sample size was 1,907 (20-41 raters per video). On 5-  
11 point Likert scales, participants rated how surprising each video felt when the ending was  
12 interrupted, as well as video memorability and emotional valence/intensity (Supplementary  
13 Tables 9-11).

#### 14 **Exclusions**

15           In the Immediate Control group, two participants were excluded due to technical issues.  
16 In the Reconsolidation group, three participants were excluded due to a counterbalancing error  
17 and audio playback problems, and two participants were excluded because they had previously  
18 completed a pilot version of the study. Additionally, one full run of fMRI data (14 trials) was  
19 excluded for one participant due to audio playback failure and excessive motion. On a trial-by-  
20 trial basis, videos were excluded if technical issues arose (e.g., audio issues) (10 trials), the  
21 participant was falling asleep (as determined by eyetracking) (20 trials), or the participant  
22 reported having seen the video prior to the experiment (103 trials). In total, there were 147 trials  
23 that were excluded for the above reasons (out of all 48 participants in both the Reconsolidation

1 and Immediate groups). The total number of excluded trials for Full and Interrupted videos was  
2 approximately equal (Full: 70; Interrupted: 77). Additionally, subsequently forgotten videos were  
3 excluded from single-trial brain-to-behavior analyses (63 trials across the 24 participants in the  
4 Reconsolidation group). Overall, only 4.4% of all trials were excluded.

### 5 **Linear Mixed-Effects Regression**

6 All linear mixed-effects regression models reported in the main text included random  
7 intercepts for *subject* (identity of each participant) and *video* (identity of each stimulus item),  
8 along with random slopes for *reactivation type*. In accordance with current best practices (84),  
9 the random effects structure was determined by the maximal amount of complexity that was  
10 supported by the data (allowing model convergence and optimizing model fits as determined by  
11 the Akaike Information Criterion). All models converged successfully; we used the BOBYQA  
12 controller with 10,000 maximum iterations. We used restricted maximum likelihood estimation  
13 and assessed significance of predictors with a Type III ANOVA and Satterthwaite  
14 approximations of degrees of freedom. In R (v3.6), we constructed models with the *lme4*  
15 package (85) and evaluated significance with the *lmerTest* package (86). Variables for  
16 *reactivation type* and *group* were treated as factors, and all continuous variables were  
17 standardized/mean-centered. These model parameters applied to analysis of behavioral data,  
18 single-trial univariate neural activation, and temporal autocorrelation. Parameter estimates from  
19 all models are reported in the Supplementary Tables. Plots were generated with the packages  
20 *ggplot2* and *sjPlot* (87, 88).

### 21 **fMRI Preprocessing**

22 All data were preprocessed and analyzed using FSL v6.0, in conjunction with in-house R  
23 code (v3.6). Initial volumes were discarded by the scanner to allow for signal saturation.

1 Preprocessing steps included fieldmap distortion correction, spatial realignment, removal of  
2 head-motion artifacts (six regressors), nuisance regression of average white matter and CSF  
3 timeseries, slice-timing correction for an interleaved multiband acquisition, and high-pass  
4 frequency filtering (120s). For native-space ROI analyses (single-trial univariate and  
5 autocorrelation analyses), data were minimally smoothed with a 2-mm kernel to preserve spatial  
6 specificity and multivariate information.

### 7 **Region of Interest Masks**

8 We used FreeSurfer (v6.0) to automatically create binarized hippocampal masks in each  
9 subject's native space. After FreeSurfer segmentation, hippocampal masks were manually  
10 inspected and segmented into ROIs for left anterior, left posterior, right anterior, and right  
11 posterior hippocampus. Anterior and posterior regions were split along the long-axis at the uncus  
12 apex. We found that our effects were very consistent among the four hippocampal ROIs  
13 (Supplemental Material, ROI Differences). Therefore, results reported in the main text (single-  
14 trial univariate and autocorrelation analyses) are averaged across the entire hippocampus  
15 bilaterally. White matter masks were obtained with FSL segmentation utilities. Inferior Lateral  
16 Occipital Cortex (LOC) masks were taken from the Harvard-Oxford Cortical Atlas. VTA masks  
17 were taken from a probabilistic midbrain atlas developed by the Adcock lab (89). Basal forebrain  
18 masks were taken from the probabilistic cytoarchitectonic Julich-Brain atlas. We used ROIs for  
19 bilateral cholinergic nuclei Ch123, including the medial septal nucleus. This region (in contrast  
20 to Ch4) exhibits resting-state functional connectivity with the hippocampus (90). We  
21 investigated temporal signal-to-noise in the basal forebrain to ensure that results were not driven  
22 by noise (Supplemental Material, Basal Forebrain SNR). All standard space masks were

1 transformed into native space for each functional run, using the inverse deformation field from  
2 preprocessing and registration.

### 3 **Univariate fMRI Analyses**

4 Whole-brain mass univariate results are reported in the Supplemental Material (Whole-  
5 Brain Analysis, Supplementary Figure 3, Supplementary Table 4). The primary findings reported  
6 in the main text reflect a single-trial modelling approach that estimated hippocampal responses to  
7 each video during the task. In order to isolate responses on each trial, we employed the Least  
8 Squares-Single approach and constructed a separate GLM for each trial (91, 92). We modelled  
9 each trial as a 2s impulse in the post-video period, convolved with the canonical double-gamma  
10 hemodynamic response function and phase-shifted 2s after video offset. This 2s shift targets the  
11 peak hippocampal response previously identified in studies of post-video processing (59, 60).  
12 Within each GLM, the target trial (2s event) was isolated as one regressor, and all other events  
13 were modelled with a separate regressor for each type of event (e.g., video playback, video name  
14 cues, other fixation periods). This approach yielded whole-brain parameter estimates for each  
15 trial, in native space. For each trial, we masked the processed data and averaged across voxels  
16 within each ROI. Average activation values within each ROI were then submitted to linear  
17 mixed-effects regression, thus linking trial-wise ROI activation to reactivation type and  
18 subsequent memory.

### 19 **Multivariate fMRI Analyses**

20 Multivariate temporal autocorrelation analyses (57, 64) were conducted on the same  
21 preprocessed data described above. We extracted the whole-run timeseries from every voxel  
22 within each ROI using the *fslmeans* utility. For control analyses (white matter and LOC ROIs),  
23 autocorrelation was calculated on 200 contiguous voxels, approximately matching the size of the

1 hippocampal ROIs. Comparable to past research, we phase-shifted the timeseries by 4 seconds in  
2 order to account for HRF lag (93). Temporal autocorrelation was defined as the Pearson product-  
3 moment correlation between all voxel activation values at timepoint T and timepoint T+1s. This  
4 method yielded an autocorrelation value for every second of each functional run, excluding the  
5 final TR. Autocorrelation values were standardized (Fisher's  $z$ ) prior to statistical analysis.

6       Next, we aligned multivariate timeseries data with event onset and duration markers.  
7 After alignment, we calculated average autocorrelation values that were time-locked to events.  
8 For statistical analyses, autocorrelation values were averaged across 5-second bins during and  
9 after each video. To analyze signal history over the course of video playback, we related the  
10 video segment number (5s bins) to average autocorrelation values. For each video, we included  
11 the first five seconds (timepoints 0-4), the next four middle segments (timepoints 5-9, 10-14, 15-  
12 19, and 20-24), and the last five seconds (variable depending on the length of the video). This  
13 binning scheme spans the average video length of 30 seconds; additional middle segments from  
14 videos that were longer than 30 seconds were omitted. Lastly, to compare post-offset changes in  
15 autocorrelation, we calculated difference scores between the 5-second bins immediately before  
16 and after video offset. Autocorrelation values and difference scores for each trial were then  
17 submitted to linear mixed effects regression.



## References

1. A. H. Sinclair, M. D. Barense, Prediction Error and Memory Reactivation: How Incomplete Reminders Drive Reconsolidation. *Trends Neurosci.* **42**, 727–739 (2019).
2. R. N. Henson, P. Gagnepain, Predictive, Interactive Multiple Memory Systems. *Hippocampus* **20**, 1315–1326 (2010).
3. M. T. J. Exton-Mcguinness, J. L. C. Lee, A. C. Reichelt, Updating memories—The role of prediction errors in memory reconsolidation. *Behav. Brain Res.* **278**, 375–384 (2015).
4. A. Pine, N. Sadeh, A. Ben-Yakov, Y. Dudai, A. Mendelsohn, Knowledge acquisition is governed by striatal prediction errors. *Nat. Commun.* **9**, 1–14 (2018).
5. G. Kim, K. A. Norman, N. B. Turk-Browne, Neural differentiation of incorrectly predicted memories. *J. Neurosci.* **37**, 2022–2031 (2017).
6. J. A. Quent, R. N. Henson, A. Greve, A predictive account of how novelty influences declarative memory. *Neurobiol. Learn. Mem.* **179**, 107382 (2021).
7. D. L. Schacter, D. R. Addis, The cognitive neuroscience of constructive memory: remembering the past and imagining the future. *Philos. Trans. R. Soc. B Biol. Sci.* **362**, 773–786 (2007).
8. L. F. Barrett, W. K. Simmons, Interoceptive predictions in the brain. *Nat. Rev. Neurosci.* **16**, 419–429 (2015).
9. K. Friston, The free-energy principle: a unified brain theory? *Nat. Rev. Neurosci.* **11**, 127–138 (2010).
10. G. B. Keller, T. D. Mrsic-Flogel, Predictive Processing: A Canonical Cortical Computation. *Neuron* **100**, 424–435 (2018).
11. M. W. Spratling, A review of predictive coding algorithms. *Brain Cogn.* **112**, 92–97 (2017).
12. R. S. Sutton, A. G. Barto, *Reinforcement learning: An introduction*, 2nd Ed. (MIT Press, 1998).
13. M. Watabe-Uchida, N. Eshel, N. Uchida, Neural circuitry of reward prediction error. *Annu. Rev. Neurosci.* **40**, 373–394 (2017).
14. N. E. Wheeler, *et al.*, Ideology and predictive processing: coordination, bias, and polarization in socially constrained error minimization. *Curr. Opin. Behav. Sci.* **34**, 192–198 (2020).
15. N. Hindy, E. Avery, N. Turk-Browne, Hippocampal-neocortical interactions sharpen over time for predictive actions. *Nat. Commun.* **10** (2019).

16. D. Shohamy, R. A. Adcock, Dopamine and adaptive memory. *Trends Cogn. Sci.* **14**, 464–472 (2010).
17. J. Chen, P. A. Cook, A. D. Wagner, Prediction strength modulates responses in human area CA1 to sequence violations. *J. Neurophysiol.* **114**, 1227–1238 (2015).
18. K. Duncan, N. Ketz, S. J. Inati, L. Davachi, Evidence for area CA1 as a match/mismatch detector: A high-resolution fMRI study of the human hippocampus. *Hippocampus* **22**, 389–398 (2012).
19. D. Kumaran, E. A. Maguire, An unexpected sequence of events: mismatch detection in the human hippocampus. *PLoS Biol.* **4**, e424 (2006).
20. O. Bein, K. Duncan, L. Davachi, Mnemonic prediction errors bias hippocampal states. *Nat. Commun.* **11**, 3451 (2020).
21. J. Chen, R. K. Olsen, A. R. Preston, G. H. Glover, A. D. Wagner, Associative retrieval processes in the human medial temporal lobe: Hippocampal retrieval success and CA1 mismatch detection. *Learn. Mem.* **18**, 523–528 (2011).
22. K. Duncan, C. Curtis, L. Davachi, Distinct memory signatures in the hippocampus: intentional states distinguish match and mismatch enhancement signals. *J. Neurosci.* **29**, 131–139 (2009).
23. J. E. Lisman, A. A. Grace, The Hippocampal-VTA Loop: Controlling the Entry of Information into Long-Term Memory. *Neuron* **46**, 703–713 (2005).
24. J. E. Lisman, N. A. Otmakhova, Storage, recall, and novelty detection of sequences by the hippocampus: elaborating on the SOCRATIC model to account for normal and aberrant effects of dopamine. *Hippocampus* **11**, 551–568 (2001).
25. J. Schomaker, M. Meeter, Short- and long-lasting consequences of novelty, deviance and surprise on brain and cognition. *Neurosci. Biobehav. Rev.* **55**, 268–279 (2015).
26. M. Hasselmo, B. Wyble, G. Wallenstein, Encoding and Retrieval of Episodic Memories: Role of Cholinergic and GABAergic Modulation in the Hippocampus. *Hippocampus* **6** (1996).
27. C. J. Honey, E. L. Newman, A. C. Schapiro, Switching between internal and external modes: A multiscale learning principle. *Netw. Neurosci.* **1**, 339–356 (2017).
28. M. Meeter, J. M. J. Murre, L. M. Talamini, Mode shifting between storage and recall based on novelty detection in oscillating hippocampal circuits. *Hippocampus* **14**, 722–741 (2004).
29. B. E. Sherman, N. B. Turk-Browne, Statistical prediction of the future impairs episodic encoding of the present. *Proc. Natl. Acad. Sci.* **8** (2020).

30. M. F. Carr, L. M. Frank, A single microcircuit with multiple functions: state dependent information processing in the hippocampus. *Curr. Opin. Neurobiol.* **22**, 704–708 (2012).
31. M. M. Chun, J. D. Golomb, N. B. Turk-Browne, A taxonomy of external and internal attention. *Annu. Rev. Psychol.* **62**, 73–101 (2011).
32. J. Debiec, J. E. LeDoux, K. Nader, Cellular and systems reconsolidation in the hippocampus. *Neuron* **36**, 527–538 (2002).
33. J. L. C. Lee, Reconsolidation: maintaining memory relevance. *Trends Neurosci.* **32**, 413–420 (2009).
34. K. Nader, G. E. Schafe, J. E. Le Doux, Fear memories require protein synthesis in the amygdala for reconsolidation after retrieval. *Nature* **406**, 722–726 (2000).
35. K. Nader, E. O. Einarsson, Memory reconsolidation: an update. *Ann N Acad Sci* **1191**, 27–41 (2010).
36. C. E. Wideman, K. H. Jardine, B. D. Winters, Involvement of classical neurotransmitter systems in memory reconsolidation: Focus on destabilization. *Neurobiol. Learn. Mem.* **156**, 68–79 (2018).
37. C. Forcato, P. Argibay, M. Pedreira, H. Maldonado, Human reconsolidation does not always occur when a memory is retrieved: The relevance of the reminder structure. *Neurobiol. Learn. Mem.* **91**, 50–57 (2009).
38. A. H. Sinclair, M. D. Barense, Surprise and destabilize: Prediction error influences episodic memory reconsolidation. *Learn. Mem.* **25**, 369–381 (2018).
39. H. Tarder-Stoll, M. Jayakumar, H. R. Dimsdale-Zucker, E. Günseli, M. Aly, Dynamic internal states shape memory retrieval. *Neuropsychologia* **138**, 107328 (2020).
40. E. L. Newman, S. N. Gillet, J. R. Climer, M. E. Hasselmo, Cholinergic blockade reduces theta-gamma phase amplitude coupling and speed modulation of theta frequency consistent with behavioral effects on encoding. *J. Neurosci.* **33**, 19635–19646 (2013).
41. L. M. Giocomo, M. E. Hasselmo, Neuromodulation by glutamate and acetylcholine can change circuit dynamics by regulating the relative influence of afferent input and excitatory feedback. *Mol. Neurobiol.* **36**, 184–200 (2007).
42. M. E. Hasselmo, The role of acetylcholine in learning and memory. *Curr. Opin. Neurobiol.* **16**, 710–715 (2006).
43. C. Kemere, M. F. Carr, M. P. Karlsson, L. M. Frank, Rapid and Continuous Modulation of Hippocampal Network State during Exploration of New Places. *PLOS ONE* **8**, e73114 (2013).

44. A. L. Decker, K. Duncan, Acetylcholine and the complex interdependence of memory and attention. *Curr. Opin. Behav. Sci.* **32**, 21–28 (2020).
45. N. Bunzeck, E. Düzel, Absolute Coding of Stimulus Novelty in the Human Substantia Nigra/VTA. *Neuron* **51**, 369–379 (2006).
46. B. C. Wittmann, N. Bunzeck, R. J. Dolan, E. Düzel, Anticipation of novelty recruits reward system and hippocampus while promoting recollection. *NeuroImage* **38**, 194–202 (2007).
47. V. P. Murty, R. A. Adcock, Enriched encoding: reward motivation organizes cortical networks for hippocampal detection of unexpected events. *Cereb. Cortex N. Y. N 1991* **24**, 2160–8 (2014).
48. D. Shohamy, A. D. Wagner, Integrating Memories in the Human Brain: Hippocampal-Midbrain Encoding of Overlapping Events. *Neuron* **60**, 378–389 (2008).
49. R. A. Adcock, A. Thangavel, S. Whitfield-Gabrieli, B. Knutson, J. D. E. Gabrieli, Reward-Motivated Learning: Mesolimbic Activation Precedes Memory Formation. *Neuron* **50**, 507–517 (2006).
50. A. Tompary, K. Duncan, L. Davachi, Consolidation of associative and item memory is related to post-encoding functional connectivity between the ventral tegmental area and different medial temporal lobe subregions during an unrelated task. *J. Neurosci.* **35**, 7326–7331 (2015).
51. K. H. Jardine, *et al.*, Activation of cortical M1 muscarinic receptors and related intracellular signaling is necessary for reactivation-induced object memory updating. *Sci. Rep.* **10**, 9209 (2020).
52. J. I. Rossato, *et al.*, State-dependent effect of dopamine D1/D5 receptors inactivation on memory destabilization and reconsolidation. *Behav. Brain Res.* **285**, 194–199 (2015).
53. A. Hupbach, R. Gomez, L. Nadel, “Episodic memory reconsolidation: An update” in *Memory Reconsolidation*, C. M. Alberini, Ed. (Elsevier Academic Press, 2013), pp. 233–247.
54. M. T. R. van Kesteren, D. J. Ruiter, G. Fernández, R. N. Henson, How schema and novelty augment memory formation. *Trends Neurosci.* **35**, 211–219 (2012).
55. R. A. Cooper, M. Ritchey, Progression from feature-specific brain activity to hippocampal binding during episodic encoding. *J. Neurosci.* **40**, 1701–1709 (2020).
56. Z. M. Reagh, A. I. Delarazan, A. Garber, C. Ranganath, Aging alters neural activity at event boundaries in the hippocampus and Posterior Medial network. *Nat. Commun.* **11**, 1–12 (2020).
57. I. K. Brunec, *et al.*, Multiple Scales of Representation along the Hippocampal Anteroposterior Axis in Humans. *Curr. Biol.* **28**, 2129-2135.e6 (2018).

58. K. B. Kjelstrup, *et al.*, Finite scale of spatial representation in the hippocampus. *Science* **321**, 140–143 (2008).
59. A. Ben-Yakov, N. Eshel, Y. Dudai, Hippocampal Immediate Poststimulus Activity in the Encoding of Consecutive Naturalistic Episodes. *J. Exp. Psychol. Gen.* **142**, 1255–1263 (2013).
60. A. Ben-Yakov, Y. Dudai, Constructing Realistic Engrams: Poststimulus Activity of Hippocampus and Dorsal Striatum Predicts Subsequent Episodic Memory. *J. Neurosci.* **31**, 9032–9042 (2011).
61. C. Baldassano, *et al.*, Discovering Event Structure in Continuous Narrative Perception and Memory. *Neuron* **95**, 709-721.e5 (2017).
62. D. Kumaran, E. A. Maguire, Match-mismatch processes underlie human hippocampal responses to associative novelty. *J. Neurosci.* **27**, 8517–8524 (2007).
63. R. U. Haque, S. K. Inati, A. I. Levey, K. A. Zaghoul, Feedforward prediction error signals during episodic memory retrieval. *Nat. Commun.* **11**, 6075 (2020).
64. R. Paz, *et al.*, A neural substrate in the human hippocampus for linking successive events. *Proc. Natl. Acad. Sci. U. S. A.* **107**, 6046–6051 (2010).
65. R. Raut, A. Snyder, M. Raichle, Hierarchical dynamics as a macroscopic organizing principle of the human brain. *PNAS* **117**, 20890–20897 (2020).
66. S. DuBrow, L. Davachi, Temporal binding within and across events. *Neurobiol. Learn. Mem.* **134**, 107–114 (2016).
67. J. Lisman, A. A. Grace, E. Duzel, A neoHebbian framework for episodic memory; role of dopamine-dependent late LTP. *Trends Neurosci.* **34**, 536–547 (2011).
68. V. P. Murty, I. C. Ballard, R. A. Adcock, Hippocampus and Prefrontal Cortex Predict Distinct Timescales of Activation in the Human Ventral Tegmental Area. *Cereb. Cortex N. Y. NY* **27**, 1660–1669 (2017).
69. A. A. Grace, S. B. Floresco, Y. Goto, D. J. Lodge, Regulation of firing of dopaminergic neurons and control of goal-directed behaviors. *Trends Neurosci.* **30**, 220–227 (2007).
70. C. G. McNamara, Á. Tejero-Cantero, S. Trouche, N. Campo-Urriza, D. Dupret, Dopaminergic neurons promote hippocampal reactivation and spatial memory persistence. *Nat. Neurosci.* **17**, 1658–1660 (2014).
71. C. G. McNamara, D. Dupret, Two sources of dopamine for the hippocampus. *Trends Neurosci.* **40**, 383–384 (2017).

72. K. A. Kempadoo, E. V. Mosharov, S. J. Choi, D. Sulzer, E. R. Kandel, Dopamine release from the locus coeruleus to the dorsal hippocampus promotes spatial learning and memory. *Proc. Natl. Acad. Sci.* **113**, 14835–14840 (2016).
73. K. Nader, Memory traces unbound. *Trends Neurosci.* **26**, 65–72 (2003).
74. C. Forcato, M. L. C. Rodríguez, M. E. Pedreira, H. Maldonado, Reconsolidation in humans opens up declarative memory to the entrance of new information. *Neurobiol. Learn. Mem.* **93**, 77–84 (2010).
75. N. T. Franklin, K. A. Norman, C. Ranganath, J. M. Zacks, S. J. Gershman, Structured Event Memory: A neuro-symbolic model of event cognition. *Psychol. Rev.* **127**, 327–361 (2020).
76. G. A. Radvansky, J. M. Zacks, Event boundaries in memory and cognition. *Curr. Opin. Behav. Sci.* **17**, 133–140 (2017).
77. V. J. H. Ritvo, N. B. Turk-Browne, K. A. Norman, Nonmonotonic Plasticity: How Memory Retrieval Drives Learning. *Trends Cogn. Sci.* **23**, 726–742 (2019).
78. D. Stawarczyk, C. Wahlheim, J. Etzel, A. Snyder, J. Zacks, Aging and the encoding of event changes: The role of neural activity pattern reinstatement. *bioRxiv* (2020) <https://doi.org/https://doi.org/10.1101/809806>.
79. D. Stawarczyk, M. A. Bezdek, J. M. Zacks, Event Representations and Predictive Processing: The Role of the Midline Default Network Core. *Top. Cogn. Sci.* (2019) <https://doi.org/10.1111/tops.12450>.
80. F. Faul, E. Erdfelder, A.-G. Lang, A. Buchner, G\*Power 3: A flexible statistical power analysis program for the social, behavioral, and biomedical sciences. *Behav. Res. Methods* **39**, 175–191 (2007).
81. A. M. Capelo, P. B. Albuquerque, S. Cadavid, Exploring the role of context on the existing evidence for reconsolidation of episodic memory. *Memory* **27**, 280–294 (2019).
82. A. Hupbach, R. Gomez, L. Nadel, Episodic memory updating: The role of context familiarity. *Psychon. Bull. Rev.* **18**, 787–797 (2011).
83. A. Hupbach, R. Gomez, O. Hardt, L. Nadel, Reconsolidation of episodic memories: A subtle reminder triggers integration of new information. *Learn. Mem.* **14**, 47–53 (2007).
84. H. Matuschek, R. Kliegl, S. Vasishth, H. Baayen, D. Bates, Balancing Type I error and power in linear mixed models. *J. Mem. Lang.* **94**, 305–315 (2017).
85. D. Bates, M. Mächler, B. Bolker, S. Walker, Fitting linear mixed-effects models using lme4 (2014).
86. A. Kuznetsova, P. B. Brockhoff, R. H. B. Christensen, lmerTest Package: Tests in Linear Mixed Effects Models. *J. Stat. Softw.* **82**, 1–26 (2017).

87. H. Wickham, *ggplot2: Elegant Graphics for Data Analysis* (Springer-Verlag New York, 2016).
88. D. Lüdtke, *sjPlot: Data Visualization for Statistics in Social Science* (2021).
89. V. P. Murty, *et al.*, Resting state networks distinguish human ventral tegmental area from substantia nigra. *NeuroImage* **100**, 580–589 (2014).
90. R. D. Markello, R. N. Spreng, W.-M. Luh, A. K. Anderson, E. De Rosa, Segregation of the human basal forebrain using resting state functional MRI. *NeuroImage* **173**, 287–297 (2018).
91. J. A. Mumford, B. O. Turner, F. G. Ashby, R. A. Poldrack, Deconvolving BOLD activation in event-related designs for multivoxel pattern classification analyses. *NeuroImage* **59**, 2636–2643 (2012).
92. J. A. Mumford, T. Davis, R. A. Poldrack, The impact of study design on pattern estimation for single-trial multivariate pattern analysis. *NeuroImage* (2014) <https://doi.org/10.1016/j.neuroimage.2014.09.026>.
93. T. Sadeh, J. Chen, Y. Goshen-Gottstein, M. Moscovitch, Overlap between hippocampal pre-encoding and encoding patterns supports episodic memory. *Hippocampus* (2019) <https://doi.org/10.1002/hipo.23079>.
